# Supplementary material
Source: PubMed Central journal article supplement (PMC5609078)
Supplement: NIHMS902747-supplement-appendix-2.pdf [file NIHMS902747-supplement-appendix-2.pdf]

**Supplementary Appendix 2. List of exclusion criteria at the abstract screening, article screening, and key question applicability levels**

|                                                                                                                  |                                                                                                                                                                                                                                                                                                                                                                                                                                                                                                                                                                                                                                                                                                          |
|------------------------------------------------------------------------------------------------------------------|----------------------------------------------------------------------------------------------------------------------------------------------------------------------------------------------------------------------------------------------------------------------------------------------------------------------------------------------------------------------------------------------------------------------------------------------------------------------------------------------------------------------------------------------------------------------------------------------------------------------------------------------------------------------------------------------------------|
| <p><b>Exclusion criteria at abstract screening, article screening, and key question applicability levels</b></p> | <ul style="list-style-type: none"> <li>• Does not evaluate renal masses (solid renal masses (or cystic renal masses with a solid component) suspicious for stage I and II renal cell carcinoma, which corresponds to clinical stage T1 (<math>\leq 7</math> cm, organ confined) or T2 (<math>&gt; 7</math> cm, organ confined) renal masses)</li> <li>• Patients with recurrent renal cell carcinoma</li> <li>• Clinically non-localized patients</li> <li>• Study published before 1997</li> <li>• Not conducted in humans</li> <li>• No original data (systematic reviews, meta-analysis, editorial, commentary)</li> <li>• Study of children only</li> <li>• Not relevant to key questions</li> </ul> |
| <p><b>Additional exclusion criteria at the article screening and key question applicability levels</b></p>       | <ul style="list-style-type: none"> <li>• Patients on hemodialysis and transplant</li> <li>• Study focuses on familial carcinomas</li> <li>• Evaluating novel techniques</li> <li>• Tumor stage not specified*</li> <li>• Does not provide any outcome of interest</li> </ul>                                                                                                                                                                                                                                                                                                                                                                                                                             |
