# Supplementary material
Source: PubMed Central journal article supplement (PMC5609078)
Supplement: NIHMS902747-supplement-table-1.pdf [file NIHMS902747-supplement-table-1.pdf]

**Supplementary Table 1. Characteristics of studies evaluating percutaneous renal mass sampling**

| Author, year                     | n      | Women: n (%) | Age (years):<br>Mean, Median,<br>Range, SD           | Race: n (%) |
|----------------------------------|--------|--------------|------------------------------------------------------|-------------|
| Campbell, 1997 <sup>12</sup>     | 25     | NR           | NR                                                   | NR          |
| Chyhrai, 2010 <sup>13</sup>      | 25     | NR           | Mean:63.0<br>SD:7.7                                  | NR          |
| Halverson, 2013 <sup>14</sup>    | 151    | NR           | Mean:59.0<br>SD:14                                   | NR          |
| Harisinghani, 2003 <sup>15</sup> | 28     | 10(36)       | Range:40-70                                          | NR          |
| Leveridge, 2011 <sup>16</sup>    | 294    | NR           | Median:64<br>Range:26-90                             | NR          |
| Londono, 2013 <sup>17</sup>      | 126    | 42(33)       | Mean:65.3<br>SD:14.6                                 | W: 96(76)   |
| Menogue, 2012 <sup>18</sup>      | 250    | NR           | Median:64<br>Range:22-88                             | NR          |
| Millet, 2012 <sup>19*</sup>      | 187    | 30*(50*)     | Median:60<br>Range:20-85                             | NR          |
| Neuzillet, 2003 <sup>20</sup>    | 88     | 40(45)       | Mean:61.32<br>Median:64<br>Range:21-88<br>SD:13.19   | NR          |
| Park, 2013 <sup>21</sup>         | 58     | 18(31)       | Mean:56.8<br>Range:24-79                             | NR          |
| Prince, 2015 <sup>30</sup>       | 525    | 191(36)      | Median:65                                            | NR          |
| Reichelt, 2007 <sup>20</sup>     | 30     | 12(40)       | Mean:63.0<br>SD:7.7                                  | NR          |
| Richard, 2015 <sup>5</sup>       | 509    | 210(40)      | Mean:64.0                                            | NR          |
| Salem, 2012 <sup>22</sup>        | 145    | 46(31)       | Mean:67.2<br>SD:11.6                                 | NR          |
| Schmidbauer, 2008 <sup>29</sup>  | 78     | 15(19)       | Mean: 63.0<br>Median: 64<br>Range: 24-86<br>SD: 13.5 | NR          |
| Shannon, 2008 <sup>23**</sup>    | 221    | NR           | Mean:64.0<br>Range:22-92                             | NR          |
| Sofikerim, 2009 <sup>24</sup>    | 42     | 21(50)       | Mean:56.1<br>Range:21-77                             | NR          |
| Vasudevan, 2006 <sup>20**</sup>  | 92     | NR           | Mean:62.0<br>Range:22-92                             | NR          |
| Volpe, 2008 <sup>20</sup>        | 91     | NR           | Median:60<br>Range:25-89                             | NR          |
| Wang, 2009 <sup>27</sup>         | 106    | 38(36)       | Mean:60.4<br>Range:28-91<br>SD:15.4                  | W:92(87)    |
| Summary**                        | 2979** | 673 (38)     | Mean:56.1-67.2<br>Median: 60-64<br>Range: 20-92      | 188 (81)    |

n= sample size; SD= Standard Deviation; W= White; NR=Not Reported

\*Only reported for patients with surgical pathology (N=60).

\*\*Summarized for unique patients; Shannon 2008 is an update of Vasudevan 2006.
