# Supplementary material
Source: PubMed Central journal article supplement (PMC5609078)
Supplement: NIHMS902747-supplement-table-2.pdf [file NIHMS902747-supplement-table-2.pdf]

**Supplementary Table 2. Characteristics of tumors in the studies evaluating percutaneous renal mass sampling**

| Author, year                      | n*   | T1, n (%) | T1a, n (%) | T1-2, n (%) | Tumor Size (cm)                                       | Tumor location-Right, n (%) |
|-----------------------------------|------|-----------|------------|-------------|-------------------------------------------------------|-----------------------------|
| Campbell, 1997 <sup>12</sup>      | 25   | 25 (100)  | NR         | NR          | Mean: 3.0<br>Median: 2.7<br>Range: 1.2-5.0<br>SD: 1.1 | NR                          |
| Chyhrat, 2010 <sup>13</sup>       | 25   | NR        | 25(100)    | NR          | Mean: 2.5<br>Range: 1.5-4.0<br>SD: 1.03               | NR                          |
| Halverson, 2013 <sup>14***</sup>  | 151  | NR        | 151(100)   | NR          | Mean: 2.8*<br>Range: 1.0-4.0<br>SD: 0.8               | NR                          |
| Harisinghani, 2003 <sup>15</sup>  | 28   | NR        | NR         | 28(100)     | NR                                                    | NR                          |
| Leveridge, 2011 <sup>16</sup>     | 314  | NR        | 314(100)   | NR          | Median: 2.5<br>Range: 0.6-4.0                         | NR                          |
| Londono, 2013 <sup>17</sup>       | 126  | NR        | NR         | 126(100)    | Mean: 5.5<br>SD: 3.7                                  | NR                          |
| Menogue, 2012 <sup>18</sup>       | 250  | NR        | 250(100)   | NR          | Median: 2.5<br>Range: 0.9-4.0                         | NR                          |
| Millet, 2012 <sup>19</sup>        | 187  | NR        | 187(100)   | NR          | Median: 3<br>Range: 0.9-4.0                           | NR                          |
| Neuzillet, 2003 <sup>20</sup>     | 88   | NR        | 88(100)    | NR          | Median: 2.8<br>Range: 0.2-4.0                         | 40(46)                      |
| Park, 2013 <sup>21</sup>          | 59   | NR        | 59(100)    | NR          | Mean: 2.3<br>Range: 1.1-3.9                           | NR                          |
| Prince, 2015 <sup>20a***</sup>    | 565  | NR        | 413(73)    | 152(27)     | Mean: 2.9, 2.2                                        | NR                          |
| Reichelt, 2007 <sup>25</sup>      | 30   | 30        | NR         | NR          | Mean: 2.9<br>SD: 1.1                                  | NR                          |
| Richard, 2015 <sup>5</sup>        | 529  | NR        | 529(100)   | NR          | Mean: 2.5                                             | 289(55)                     |
| Salem, 2012 <sup>22</sup>         | 145  | NR        | 145(100)   | NR          | Mean: 2.4<br>SD: 1.1                                  | 77(53)                      |
| Schmidbauer, 2008 <sup>23</sup>   | 78   | NR        | 44(56)     | 34(44)      | Mean: 4.0<br>Median: 3.9<br>Range: 0.8-9.0<br>SD: 1.8 | 39(50)                      |
| Shannon, 2008 <sup>23a****</sup>  | 222  | 222(100)  | NR         | NR          | Median: 2.9<br>Range: 1.0-4.9                         | NR                          |
| Sofikerim, 2009 <sup>24</sup>     | 42   | NR        | NR         | 42<br>100   | Mean: 6.4<br>Range: 2.5-14.0                          | 21(50)                      |
| Vasudevan, 2006 <sup>25****</sup> | 92   | 92(100)   | NR         | NR          | NR                                                    | NR                          |
| Volpe, 2008 <sup>26</sup>         | 100  | NR        | 100(100)   | NR          | Median: 2.4<br>Range: 0.8-4.0                         | 47(47)                      |
| Wang, 2009 <sup>27</sup>          | 110  | NR        | 110(100)   | NR          | Mean: 2.7<br>Range: 0.5-4.0<br>SD: 0.9                | 50(46)                      |
| Summary**                         | 3074 | 277 (9)   | 2415 (79)  | 382 (12)    | Mean: 2.3-6.4<br>Median: 2.2-3.9<br>Range: 0.5-14.0   | 563(52)                     |

n= sample size; SD= Standard Deviation; NR=Not Reported

\*<sup>16, 21, 23, 26, 27</sup> include a few patients with multiple tumors biopsied.

\*\*Tumor size only reported for patients with malignant results on biopsy (N=133).

\*\*\*Tumor size given for diagnostic and nondiagnostic groups separately as listed in table, respectively

\*\*\*\*Summarized for unique patients; Shannon 2008 is an update of Vasudevan 2006.
