# Supplementary material
Source: PubMed Central journal article supplement (PMC5609078)
Supplement: NIHMS902747-supplement-table-3.pdf [file NIHMS902747-supplement-table-3.pdf]

**Supplementary Table 3. Details of biopsy pathology results across included studies**

| Author, year                     | N    | Non-diagnostic n (%) | Malignant n (%) | Benign n (%) | Clear cell RCC n (%) | Papillary RCC n (%) | Chromophobe RCC, n (%) | RCC (no category assigned) n (%) | Other Malignant n (%) | Oncocytoma n (%) | AML n (%) | No Neoplasm n (%) | Other Benign n (%) |
|----------------------------------|------|----------------------|-----------------|--------------|----------------------|---------------------|------------------------|----------------------------------|-----------------------|------------------|-----------|-------------------|--------------------|
| Campbell, 1997 <sup>12</sup>     | 25   | 9(36)                | 10(40)          | 6(24)        | NR                   | NR                  | NR                     | NR                               | NR                    | NR               | NR        | NR                | NR                 |
| Chyhai, 2010 <sup>13</sup>       | 25   | 2(8)                 | 16(64)          | 7(28)        | 14(56)               | 1(4)                | NR                     | NR                               | 1(4)                  | 6(24)            | NR        | NR                | 1(NR)              |
| Halverson, 2013 <sup>14</sup>    | 151  | 14(9)                | 130(86)         | 7(5)         | 97(64)               | 25(17)              | 3(2)                   | 3(2)                             | 2(1)                  | 3(2)             | NR        | NR                | 4(3)               |
| Harisinghani, 2003 <sup>15</sup> | 28   | 0                    | 17(61)          | 11(39)       | NR                   | NR                  | NR                     | 16(57)                           | 1(4)                  | 1(4)             | NR        | 9(32)             | 1(4)               |
| Leveridge, 2011 <sup>16</sup>    | 345  | 67(19)               | 221(64)         | 57(17)       | 122(35)              | 48(14)              | 13(4)                  | 25(7)                            | 13(4)                 | 32(9)            | 11(3)     | NR                | 14(4)              |
| Londono, 2013 <sup>17</sup>      | 132  | 7(5)                 | 87(66)          | 38(29)       | NR                   | NR                  | NR                     | NR                               | NR                    | NR               | NR        | NR                | NR                 |
| Menogue, 2012 <sup>18</sup>      | 250  | 52(21)               | 148(59)         | 50(20)       | 100(40)              | 33(13)              | 11(4)                  | NR                               | 4(2)                  | 33(13)           | 9(4)      | 6(2)              | 2(1)               |
| Millet, 2012 <sup>19*</sup>      | 187  | NR                   | 145(78)         | NR           | NR                   | NR                  | NR                     | 132(71)                          | 13(7)                 | NR               | NR        | NR                | NR                 |
| Neuzillet, 2003 <sup>20</sup>    | 88   | 8(9)                 | 66(75)          | 14(16)       | 49(56)               | 10(11)              | 6(7)                   | NR                               | 1(1)                  | 10(11)           | 3(3)      | NR                | 1(1)               |
| Park, 2013 <sup>21</sup>         | 59   | 11(19)               | 37(63)          | 11(19)       | NR                   | NR                  | NR                     | 29(49)                           | 8(14)                 | 2(3)             | 6(10)     | 3(5)              | NR                 |
| Prince, 2015 <sup>30</sup>       | 565  | 83(15)               | 393(70)         | 89(16)       | 260(46)              | 48(9)               | 5                      | 33(6)                            | 47(8)                 | 77(14)           | 11(2)     | NR                | 1(0.2)             |
| Reichelt, 2007 <sup>26</sup>     | 30   | 5(17)                | 17(57)          | 8(27)        | NR                   | NR                  | NR                     | 16(53)                           | 1(3)                  | 6(20)            | NR        | NR                | 2(7)               |
| Richard, 2015 <sup>22**</sup>    | 529  | 53(10)               | 353(67)         | 123(23)      | 214(41)              | 95(18)              | 26(5)                  | 17(3)                            | 13(3)                 | 80(15)           | 36(7)     | NR                | 15(3)              |
| Salem, 2012 <sup>22</sup>        | 145  | 19(13)               | 107(74)         | 19(13)       | 57(39)               | 22(15)              | 8(6)                   | 2(1)                             | 18(12)                | 15(10)           | NR        | 4(3)              | NR                 |
| Schmidbauer, 2008 <sup>23</sup>  | 78   | 2(3)                 | 60(77)          | 16(21)       | 48(80)               | 3(4)                | 3(4)                   | 4(5)                             | 2(3)                  | 13(17)           | 2(3)      | 1(1)              | NR                 |
| Shannon, 2008 <sup>23***</sup>   | 224  | 50(22)               | 132(59)         | 42(19)       | 85(38)               | 25(11)              | 11(5)                  | 3(1)                             | 8(4)                  | 25(11)           | 13(6)     | 3(1)              | 1(0.4)             |
| Sofikerim, 2009 <sup>24</sup>    | 42   | 3(7)                 | 33(79)          | 6(14)        | 32(76)               | 1(2)                | 0                      | NR                               | NR                    | 4(10)            | 1(2)      | NR                | 1(2)               |
| Vasudevan, 2006 <sup>20***</sup> | 92   | 29(32)               | 43(47)          | 20(22)       | 28(30)               | 4(4)                | 5(5)                   | NR                               | 6(7)                  | 11(12)           | 9(10)     | NR                | NR                 |
| Volpe, 2008 <sup>26</sup>        | 100  | 16(16)               | 66(66)          | 18(18)       | 37(37)               | 16(16)              | 3(3)                   | 4(4)                             | 6(6)                  | 7(7)             | 5(5)      | 4(4)              | 2(2)               |
| Wang, 2009 <sup>27</sup>         | 110  | 10(9)                | 65(59)          | 35(32)       | NR                   | NR                  | NR                     | 56(51)                           | 11(10)                | 13(12)           | 3(3)      | 16(15)            | 1(1)               |
| Summary <sup>***</sup>           | 3113 | 411(14.1*)           | 2103 (68)       | 557(19*)     | 1115(36)             | 327(11)             | 89(3)                  | 340(11)                          | 149(5)                | 327(11)          | 100(3)    | 46(2)             | 46(2)              |

n= sample size; NR=Not Reported; RCC=Renal Cell Carcinoma; AML=Angiomyolipoma

\*42 (22.5%) biopsies were benign or non-diagnostic but the proportion of each was not reported; therefore, Millet, 2012 is excluded from calculation of proportion of non-diagnostic and benign biopsies

\*\*Biopsy Pathology Results includes 20 repeat biopsies which were diagnostic

\*\*\*Summarized for unique patients/biopsies; Shannon 2008 is an update of Vasudevan 2006; histology percentages add to 100% after inclusion of 42 unclassified benign and non-diagnostic biopsies (Millet, 2012) and absence of histologies from 125 (Londono, 2013) and 16 (Campbell, 1997) biopsies
