# Supplementary material
Source: PubMed Central journal article supplement (PMC5609078)
Supplement: NIHMS902747-supplement-table-4.pdf [file NIHMS902747-supplement-table-4.pdf]

**Supplementary Table 4. Details for the “other” malignant and benign biopsy pathology results from Table 3.**

| Author, year                     | No Neoplasm: n (details)                            | Other Malignant: n (details)                                                          | Other Benign: n (details)                                  |
|----------------------------------|-----------------------------------------------------|---------------------------------------------------------------------------------------|------------------------------------------------------------|
| Campbell, 1997 <sup>12</sup>     | NR                                                  | NR                                                                                    | NR                                                         |
| Chyhai, 2010 <sup>13</sup>       | NR                                                  | 1 (1 adenocarcinoma)                                                                  | 1 (1 leiomyoma)                                            |
| Halverson, 2013 <sup>14</sup>    | NR                                                  | 2 (1 urothelial, 1 sarcomatoid renal cell carcinoma)                                  | 4 (4 unspecified benign biopsies)                          |
| Harisinghani, 2003 <sup>15</sup> | 9 (6 hemorrhagic cysts, 3 inflammatory cysts)       | 1 (1 lymphoma)                                                                        | 1 (1 metanephric adenoma)                                  |
| Leveridge, 2011 <sup>16</sup>    | NR                                                  | 13 (13 unspecified malignant)                                                         | 14 (14 "other" benign)                                     |
| Londono, 2013 <sup>17</sup>      | NR                                                  | NR                                                                                    | NR                                                         |
| Menogue, 2012 <sup>18</sup>      | 6 (6 cysts)                                         | 4 (1 multilocular renal cell carcinoma, 1 urothelial, 1 TCC 1 metastasis)             | 2 (1 metanephric adenoma, 1 leiomyoma)                     |
| Millet, 2012 <sup>19</sup>       | NR                                                  | 13 (13 "other" malignant)                                                             | NR (42 benign or non-diagnostic biopsies)                  |
| Neuzillet, 2003 <sup>20</sup>    | NR                                                  | 1 (1 lymphoma)                                                                        | 1 (1 cystadenoma)                                          |
| Park, 2013 <sup>21</sup>         | 3 (3 inflammatory cysts)                            | 8 (4 metastasis, 2 urothelial, 1 PTL, 1 lymphoma)                                     | NR                                                         |
| Prince, 2015 <sup>30</sup>       | NR                                                  | 47 (unspecified urothelial, collecting duct, lymphoma, leukemia)                      |                                                            |
| Reichelt, 2007 <sup>20</sup>     | NR                                                  | 1 (1 collecting duct carcinoma)                                                       |                                                            |
| Richard, 2015 <sup>9</sup>       | NR                                                  | 13 (1 mucinous tubular and spindle cell carcinoma, 9 metastasis, 3 "other" malignant) | 15 (3 metanephric adenoma, 2 leiomyoma, 10 "other" benign) |
| Salem, 2012 <sup>22</sup>        | 4 (4 cysts)                                         | 18 (1 renal medullary, 2 lymphoma, 15 metastasis)                                     | NR                                                         |
| Schmidbauer, 2008 <sup>23</sup>  | 1 (1 cyst)                                          | 2 (1 TCC, 1 metastasis)                                                               | NR                                                         |
| Shannon, 2008 <sup>23</sup>      | 3 (3 cysts)                                         | 8 (5 metastasis, 2 TCC, 1 collecting duct carcinoma)                                  | 1 (1 metanephric adenoma)                                  |
| Sofikerim, 2009 <sup>24</sup>    | NR                                                  | NR                                                                                    | 1 (1 leiomyoma)                                            |
| Vasudevan, 2006 <sup>22</sup>    | NR                                                  | 6 (6 metastasis)                                                                      | NR                                                         |
| Volpe, 2008 <sup>26</sup>        | 4 (2 inflammatory cysts, 2 fibrosis)                | 6 (2 metastasis, 1 TCC, 1 SCC, 2 other malignant)                                     | 2 (2 leiomyoma)                                            |
| Wang, 2009 <sup>27</sup>         | 16 (14 normal tissue, 1 fibrosis, 1 sarcoid lesion) | 11 (3 lymphoma, 5 metastasis, 1 PTL, 2 mixed epithelial/stroma tumor)                 | 1 (1 metanephric adenoma)                                  |
| Summary                          | 46                                                  | 149                                                                                   | 46                                                         |

n= sample size; NR=Not Reported; PTL= post-transplant lymph proliferative disorder
