# Supplementary material
Source: PubMed Central journal article supplement (PMC5609078)
Supplement: NIHMS902747-supplement-table-5.pdf [file NIHMS902747-supplement-table-5.pdf]

**Supplementary Table 5. Fuhrman grading results for studies reporting grade at biopsy**

| Author, year                    | N    | Renal cell carcinoma, n | Grade Assigned, n (%) | Fuhrman Grade:<br>1-2: n (%)<br>3-4: n (%) | Surgical Pathology Available | Upgraded: n (%) |
|---------------------------------|------|-------------------------|-----------------------|--------------------------------------------|------------------------------|-----------------|
| Campbell,1997 <sup>12</sup>     | 25   | 10                      | 10(100)               | 1-2: 7(70)<br>3-4: 3(30)                   | 10                           | 1(10)           |
| Halverson, 2013 <sup>14</sup>   | 151  | 125                     | 97(78)                | 1-2: 85(88)<br>3-4:12(12)                  | 97                           | 37(38)          |
| Leveridge, 2011 <sup>10</sup>   | 345  | 183                     | 100(55)               | 1-2: 89(89)<br>3-4:11(1)                   | NR                           | NR              |
| Menogue, 2012 <sup>10</sup>     | 250  | 144                     | 122(85)               | 1-2: 115(94)<br>3-4: 7(5.7)                | 72                           | 17(24)          |
| Millet, 2012 <sup>19</sup>      | 187  | 132                     | NR*                   | 1-2: 53(87)<br>3-4: 8(13)                  | 61                           | 0(0)            |
| Neuzillet, 2003 <sup>20</sup>   | 88   | 65                      | 61(94)                | 1-2: 55(90)<br>3-4:6(9.83)                 | 52                           | 7(13)           |
| Park, 2013 <sup>21</sup>        | 59   | 29                      | 4(14)                 | NR                                         | 4                            | 2(50)           |
| Richard, 2015 <sup>9</sup>      | 529  | 352                     | 211(60)               | 1-2: 194(92)<br>3-4: 17(8)                 | 101                          | 6(6)            |
| Salem, 2012 <sup>22</sup>       | 145  | 90                      | 47(52)                | 1-2: 28(60)<br>3-4: 19(40)                 | 33                           | NR              |
| Schmidbauer, 2008 <sup>29</sup> | 78   | 58                      | 47(81)                | NR                                         | 47                           | 2(4)            |
| Sofikerim, 2009 <sup>24</sup>   | 42   | 34                      | 34(100)               | 1-2: 32(94)<br>3-4: 2(6)                   | 33                           | 6(18)           |
| Volpe, 2008 <sup>20</sup>       | 100  | 60                      | 41(68)                | 1-2: 30(73)<br>3-4: 11(27)                 | 12                           | 0(0)            |
| Summary                         | 1999 | 1282                    | 774(67**)             | 1-2: 688(88)<br>3-4: 96(12)                | 489***                       | 78(16)          |

n= sample size; SD= Standard Deviation; W= White; NR=Not Reported

\*Proportion of biopsies showing renal cell carcinoma that had grade assigned not reported; however, biopsy grade for 61 with surgical pathology available is reported.

\*\*Denominator excludes <sup>19</sup> (N=132) as overall proportion assigned grade at biopsy not reported.

\*\*\*Total excludes <sup>19</sup> and <sup>22</sup> as proportion upgraded on surgical pathology not given.
