# Supplementary material
Source: PubMed Central journal article supplement (PMC5609078)
Supplement: NIHMS902747-supplement-table-6.pdf [file NIHMS902747-supplement-table-6.pdf]

**Supplementary Table 6. Calculated performance characteristics from each individual study based on patients with available surgical pathology**

| Author, year                     | Biopsy n        | Surgery n (%)        | Non-diagnostic biopsy  |                 | Benign biopsy  |                        | Malignant biopsy |                | Sensitivity (%) | Specificity (%) | PPV (%)         | NPV (%)       |
|----------------------------------|-----------------|----------------------|------------------------|-----------------|----------------|------------------------|------------------|----------------|-----------------|-----------------|-----------------|---------------|
|                                  |                 |                      | Surgery n              | Malignant n (%) | True Negative  | False Negative         | True Positive    | False Positive |                 |                 |                 |               |
| Campbell, 1997 <sup>12</sup>     | 25              | 25(100)              | 9                      | 9(100)          | 0              | 6                      | 10               | 0              | 62.5            | NA              | 100             | 0.0           |
| Chyhrail, 2010 <sup>13</sup>     | 25              | 21(84)               | 1                      | 1(100)          | 5              | 1                      | 14               | 0              | 93.3            | 100             | 100             | 83.3          |
| Halverson, 2013 <sup>14</sup>    | 151             | 151(100)             | NR                     | NR              | 4              | 3                      | 130              | 0              | 97.7            | 100             | 100             | 57.1          |
| Harisinghani, 2003 <sup>15</sup> | 28              | 16(57)               | 0                      | NR              | 1              | 0                      | 16               | 0              | 100             | 100             | 100             | 100           |
| Leveridge, 2011 <sup>16</sup>    | 345             | 74(21)               | 6                      | 5(83)           | NR             | NR                     | NR               | NR             | NA              | NA              | NA              | NA            |
| Londono, 2013 <sup>17</sup>      | 132             | 63(48)               | 2                      | 2(100)          | 2              | 13                     | 46               | 0              | 78.0            | 100             | 100             | 13.3          |
| Menogue, 2012 <sup>18</sup>      | 250             | 129(52)              | 9                      | 8(89)           | 6              | 0                      | 114              | 0              | 100             | 100             | 100             | 100           |
| Millet, 2012 <sup>19*</sup>      | 187             | 61(33)               | NR                     | NR              | NR             | NR                     | 61               | 0              | NA              | NA              | 100             | NA            |
| Neuzillet, 2003 <sup>20</sup>    | 88              | 62(70)               | 5                      | 5(100)          | 1              | 0                      | 56               | 0              | 100             | 100             | 100             | 100           |
| Park, 2013 <sup>21</sup>         | 59              | 13(22)               | 2                      | 2(100)          | 0              | 0                      | 11               | 0              | 100             | NA              | 100             | NA            |
| Prince, 2015 <sup>20</sup>       | 565             | NR                   | NR                     | NR              | NR             | NR                     | NR               | NR             | NA              | NA              | NA              | NA            |
| Reichelt, 2007 <sup>26</sup>     | 30              | 22(73)               | 4                      | 4(100)          | 4              | 0                      | 14               | 0              | 100             | 100             | 100             | 100           |
| Richard, 2015 <sup>9</sup>       | 529             | 171(32)              | 4                      | 4(100)          | 3              | 0                      | 163              | 1              | 100             | 75.0            | 99.4            | 100           |
| Salem, 2012 <sup>22</sup>        | 145             | 93(64)               | 6                      | 6(100)          | 0              | 0                      | 87               | 0              | 100             | NA              | 100             | NA            |
| Schmidbauer, 2008 <sup>29</sup>  | 78              | 78(100)              | 2                      | 2(100)          | 13             | 3                      | 60               | 0              | 95.2            | 100             | 100             | 81.3          |
| Shannon, 2008 <sup>23**</sup>    | 224             | 118(53)              | 15                     | 12(80)          | 7              | 0                      | 96               | 0              | 100             | 100             | 100             | 100           |
| Sofikerim, 2009 <sup>24</sup>    | 42              | 42(100)              | 3                      | 3(100)          | 3              | 3                      | 32               | 1              | 91.4            | 75.0            | 97.0            | 50.0          |
| Vasudevan, 2006 <sup>25**</sup>  | 92              | 48(52)               | 9                      | 8(89)           | 3              | 0                      | 36               | 0              | 100             | 100             | 100             | 100           |
| Volpe, 2008 <sup>26</sup>        | 100             | 23(23)               | 3                      | 1(33)           | 0              | 0                      | 20               | 0              | 100             | NA              | 100             | NA            |
| Wang, 2009 <sup>27</sup>         | 110             | 36(33)               | 2                      | 2(100)          | 1              | 0                      | 33               | 0              | 100             | 100             | 100             | 100           |
| <b>Summary</b>                   | <b>Biopsy n</b> | <b>Surgery n (%)</b> | <b>Sensitivity (%)</b> |                 | <b>95% CI*</b> | <b>Specificity (%)</b> |                  | <b>95% CI</b>  | <b>PPV* (%)</b> | <b>95% CI</b>   | <b>NPV* (%)</b> | <b>95% CI</b> |
| <b>Diagnostic Biopsies Only</b>  | 2640**          | 1246(47)             | 96.9                   |                 | 95.8-98.0      | 96.2                   |                  | 90.7-100       | 99.8            | 99.5-100        | 63.3            | 52.4-74.2     |
| <b>Core Biopsy Subset</b>        | 2615**          | 1221(47)             | 97.5                   |                 | 96.5-98.5      | 96.2                   |                  | 90.7-100       | 99.8            | 99.5-100        | 68.5            | 57.6-79.4     |

n= sample size; NR=Not Reported; NA=Not Applicable; NPV=negative predictive value; PPV=positive predictive value; 95% CI = 95% Confidence Interval

\*42 (22.5%) biopsies were benign or non-diagnostic but the proportion of each is not reported.

\*\*Summarized for unique patients/biopsies; Shannon 2008 is an update of Vasudevan 2006
