# Supplementary material
Source: PubMed Central journal article supplement (PMC5609078)
Supplement: NIHMS902747-supplement-table-7.pdf [file NIHMS902747-supplement-table-7.pdf]

**Supplementary Table 7. Studies reporting harms and adverse events associated with percutaneous renal mass sampling**

| Author, year                     | N    | Radiation exposure, n (%) | Hemorrhage, n (%) | Hematoma, n (%) | Pain, n (%) | Pneumothorax, n (%) | Tumor Seeding, n (%) | Hematuria, n (%) | Other                                                                              |
|----------------------------------|------|---------------------------|-------------------|-----------------|-------------|---------------------|----------------------|------------------|------------------------------------------------------------------------------------|
| Campbell, 1997 <sup>12</sup>     | 25   | 25(100)                   | 0                 | 10(40)          | NR          | 0                   | 0                    | NR               |                                                                                    |
| Chyhrari, 2010 <sup>13</sup>     | 25   | 0                         | 1(4)              | NR              | 1(4)        | 0                   | 0                    | NR               |                                                                                    |
| Harisinghani, 2003 <sup>15</sup> | 28   | 28(100)                   | NR                | NR              | NR          | NR                  | NR                   | NR               |                                                                                    |
| Leveridge, 2011 <sup>16</sup>    | 227* | 151 (of 336) (45)         | 0                 | 22(10)          | NR          | 2(1)                | 0(0)                 | 3(1)*            | 1 syncope                                                                          |
| Millet, 2012 <sup>19</sup>       | 187  | 187(100)                  | NR                | NR              | NR          | NR                  | NR                   | NR               |                                                                                    |
| Neuzillet, 2003 <sup>20</sup>    | 88   | 88(100)                   | 0                 | 0               | 0           | NR                  | 0                    | NR               |                                                                                    |
| Park, 2013 <sup>21</sup>         | 59   | 0                         | 0                 | 9(15)           | 3(5)        | 0                   | NR                   | 0                |                                                                                    |
| Prince, 2015 <sup>30</sup>       | 565  | 48(9)                     | 3(0.5)**          | NR              | NR          | NR                  | NR                   | NR               | 7 hospital admissions                                                              |
| Reichelt, 2007 <sup>28</sup>     | 30   | 0                         | 1(3)              | 1(3)            | 1(3)        | NR                  | NR                   | NR               |                                                                                    |
| Richard, 2015 <sup>5</sup>       | 492  | 115 (of 503) (23)         | NR                | 24(5)           | 3(0.6)      | NR                  | 0                    | 5(1)             | 12 coaxial sheath venous bleeding, 2 dizziness, 2 nausea/vomiting, 1 skin hematoma |
| Salem, 2012 <sup>22</sup>        | 145  | 145(100)                  | 0                 | 2(1)            | 0           | NR                  | 0                    | NR               | 1 flank ecchymosis                                                                 |
| Schmidbauer, 2008 <sup>29</sup>  | 78   | 78(100)                   | 0                 | 4(5)            | NR          | 1(1)                | NR                   | NR               |                                                                                    |
| Shannon, 2008 <sup>23</sup>      | 221  | NR                        | 1(0.4)            | 1(0.4)          | NR          | NR                  | 0                    | NR               |                                                                                    |
| Sofikerim, 2009 <sup>24</sup>    | 42   | 42(100)                   | 0                 | 0               | 0           | NR                  | 0                    | 0                |                                                                                    |
| Volpe, 2008 <sup>26</sup>        | 100  | 55(55)                    | 0                 | NR              | 1(1)        | 1(1)                | 0                    | NR               | 1 syncope                                                                          |
| Wang, 2009 <sup>27</sup>         | 110  | 66(60)                    | NR                | 2(2)            | 4(4)        | 0                   | NR                   | NR               | 1 wound infection, 1 hypotension requiring fluid resuscitation                     |
| Summary                          |      | 1028(44)                  | 6(0.4)            | 75(5)           | 13(1.2)     | 4(0.6)              | 0(0)                 | 8(1)             |                                                                                    |

n= sample size; NR=Not Reported

\*67 patients without complication data available; Clavien 1 complications in 10.1% of patients; one Clavien 3a complication (0.3%) noted involving gross hematuria leading to urinary retention due to formation of clots

\*\*One Clavien 3a complication (selective renal artery embolization for bleeding leading to hemodynamic instability)

\*\*\*One Clavien 3b complication (required percutaneous embolization)
